# Supplementary material for: Modelling seawater p CO 2 and pH in the Canary Islands region based on satellite measurements and machine learning techniques
Source: Copernicus journal article supplement (doi:10.5194/os-22-609-2026), 2026-02-12
Supplement: Supplementary file 1 [file os-22-609-2026-supplement.pdf]

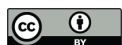

*Supplement of*

## **Modelling seawater $p\text{CO}_2$ and pH in the Canary Islands region based on satellite measurements and machine learning techniques**

**Irene Sánchez-Mendoza et al.**

*Correspondence to:* Melchor González-Dávila ([melchor.gonzalez@ulpgc.es](mailto:melchor.gonzalez@ulpgc.es))

The copyright of individual parts of the supplement might differ from the article licence.

## SUPPLEMENTARY MATERIAL

### METHODS

The two VOS have a SBE38 Digital Oceanographic Thermometer (SeaBird™), located at the seawater inlet, measuring the sea surface temperature (SST) with high accuracy ( $\pm 0.001^{\circ}\text{C}$ ). The seawater then splits into three lines; the first goes to a set of additional sensors, including an SBE45 Digital Thermosalinograph (accuracy of  $\pm 0.001^{\circ}\text{C}$  and  $\pm 0.0001 \text{ S m}^{-2}$  for temperature and conductivity, respectively) for sea surface salinity (SSS), and an Aanderaa sensor for oxygen. The second seawater line goes to the equilibrator system, located in the wet box of a General Oceanics™ GO8050 automated seawater system and then to the non-dispersive infrared LICOR© analyser for gas detection (models 6262 until 2021 and 7000 later) placed inside the dry box responsible for measuring the molar fraction of  $\text{CO}_2$  ( $x\text{CO}_2$ , ppm). The analyser is automatically calibrated on departure and arrival at each port and periodically in a loop every three hours using four standard gases (in the order of 0 ppm, 250 ppm, 400 ppm and 550 ppm and with an accuracy of  $\pm 0.02$  ppm). They are provided by the National Ocean and Atmospheric Administration (NOAA) and the ICOS CAL research facilities (after 2022) and traceable to the World Meteorological Organization (WMO). The third seawater line goes out to favor low temperature differences between the intake and the equilibrator. After 2022, the  $\text{CO}_2$  equipment on CanOA-VOS-2 was replaced by a membrane  $\text{CO}_2$ -PRO FT-ATM (ProOceanus™), which also uses four calibration gases.

The two moored oceanographic buoys are equipped with several sensors. The sensors integrated in the oceanographic buoys (González et al., 2023) include an SBE 37-SI/SIP MicroCAT thermosalinometer that measures SST and salinity every hour, a Cyclops-7F fluorescence sensor, an Optode 4835 Oximeter and a SAMI-pH pH-meter that measures every three hours. Both buoys contain a ProOceanus  $\text{pCO}_2$  PRO-CV monitoring system.

MORGAN-1 also had a Battelle  $p\text{CO}_2$  monitoring system (years 2020-2021) with a span calibration gas of 534.56 ppm, while ULA-2 includes a SAMI- $p\text{CO}_2$  sensor. All  $p\text{CO}_2$  sensors measure at a frequency of three hours. Measured data is sent to a central data logger, which records all data and sends it to a server via satellite signal.

Figure S1. Longitudinal distribution of the seasonal and annual means of observational SST (top) and satellite-based SST (bottom). Plots on the left correspond to the westernmost part (along the CanOA-VOS-2 track) averaged seasonally and annually at longitudinal intervals of 0.05°. Plots on the right are for the easternmost part (along the CanOA-VOS-1 track) averaged at 0.1°.

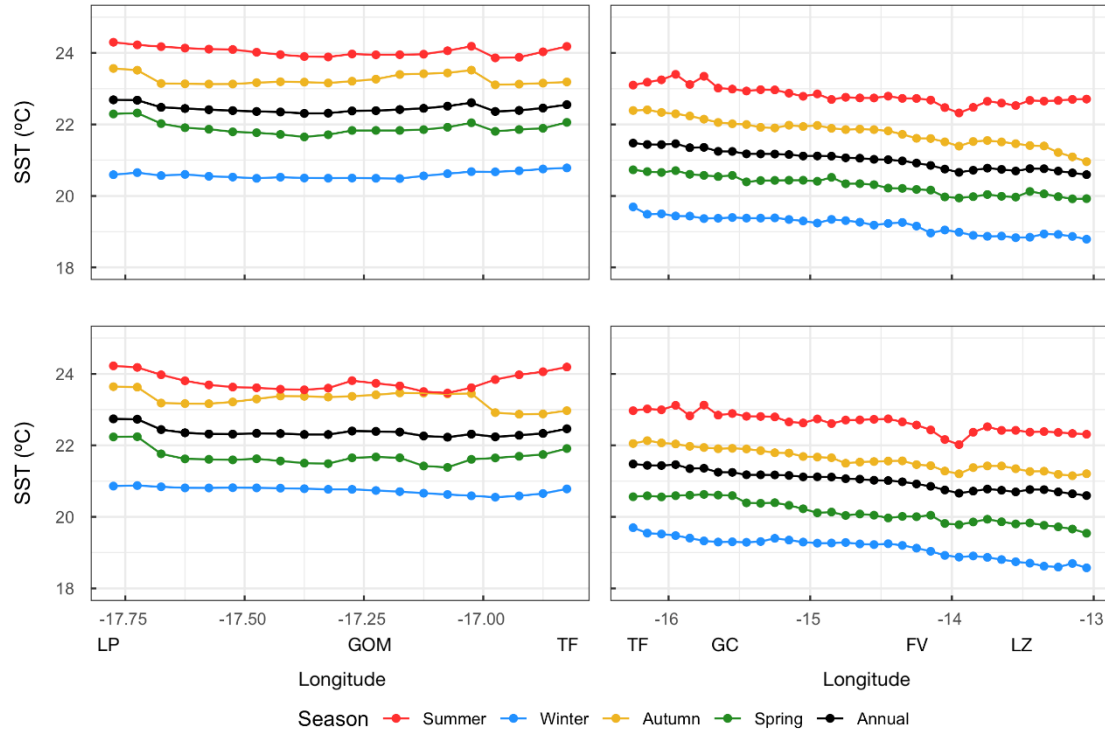

Figure S2. Measured vs. predicted  $p\text{CO}_{2,\text{sw}}$  in the training and validation dataset for the different predictive models containing  $p\text{CO}_{2,\text{atm}}$  + SST + Chl  $a$  + MLD.

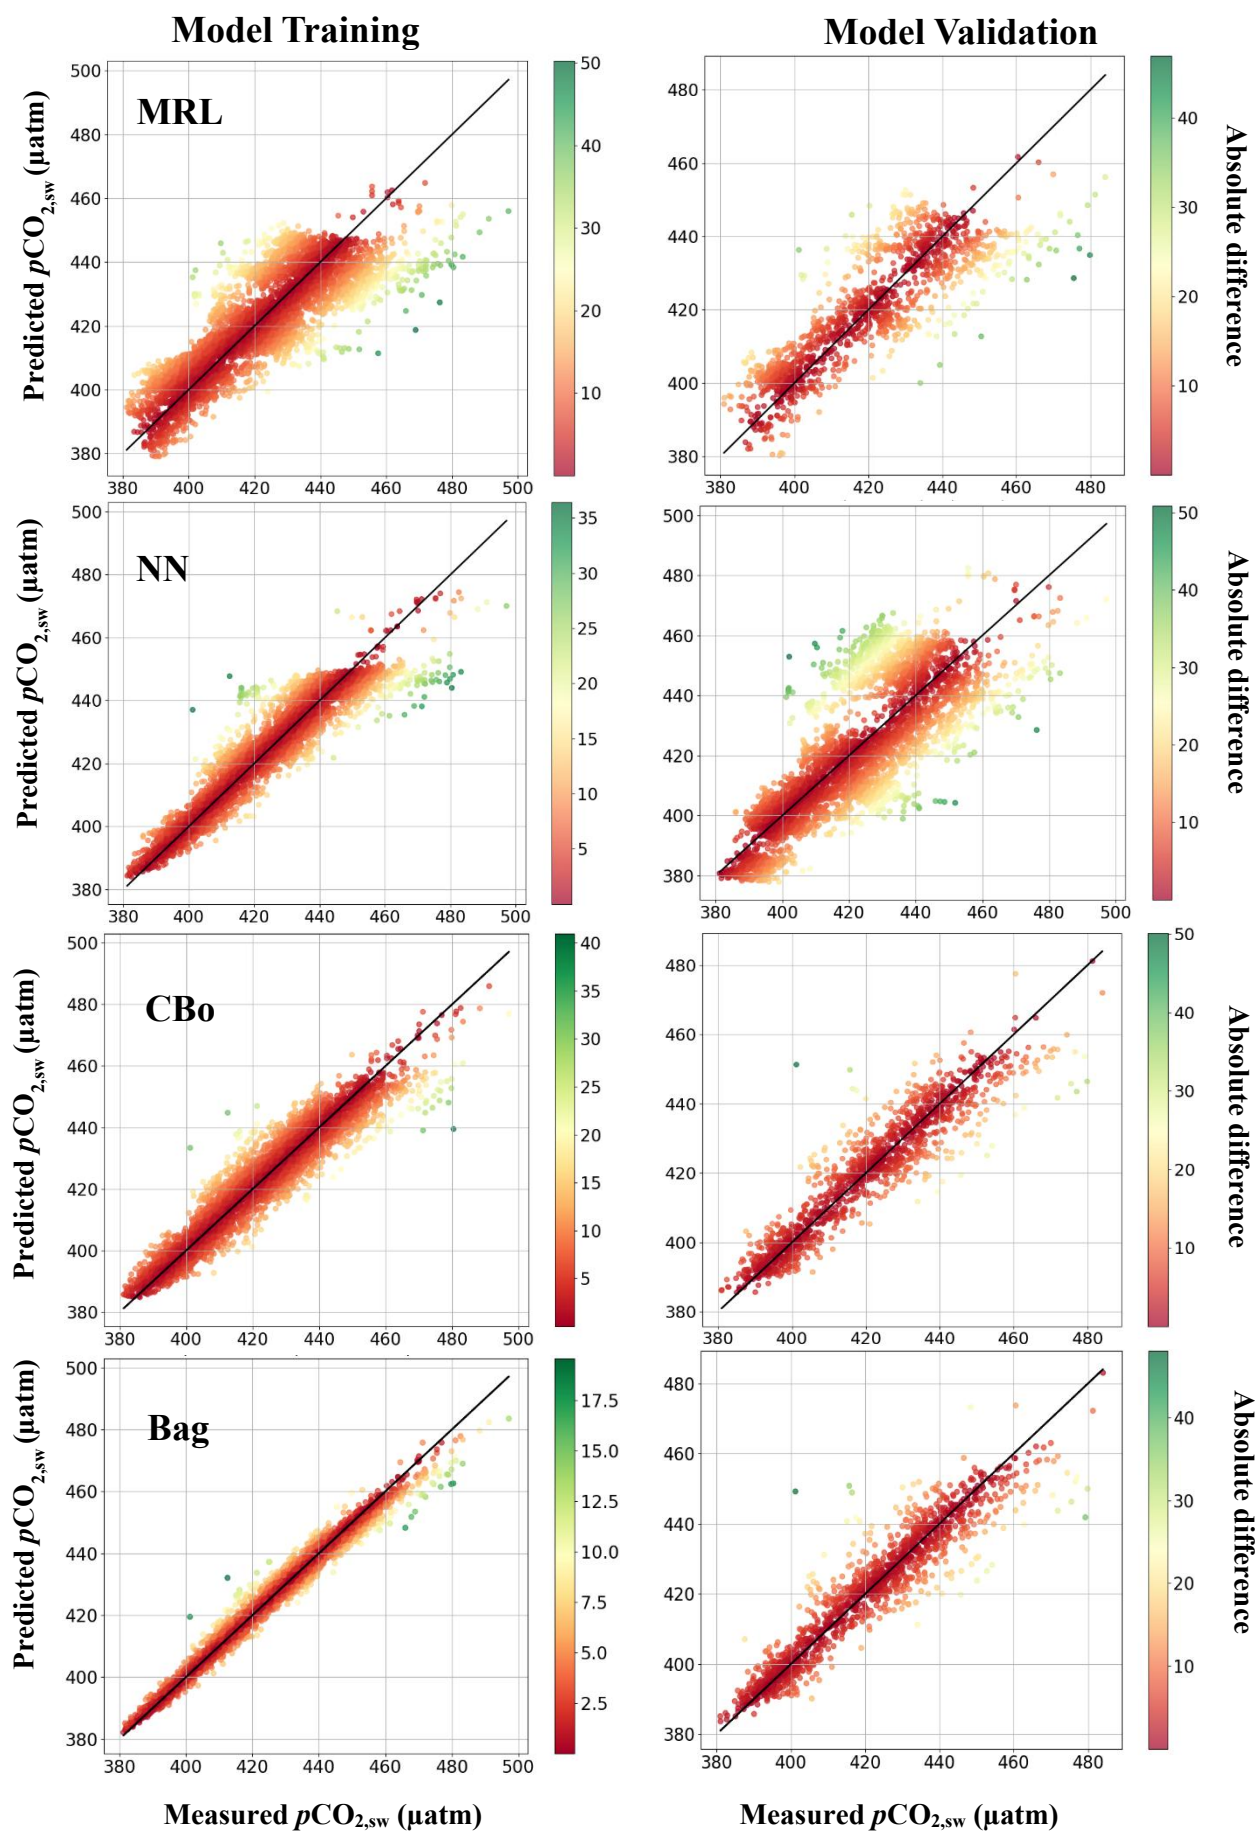

Figure S3. Measured vs. predicted  $\text{pH}_{\text{T,issw}}$  in the training and validation dataset for the different predictive models containing SST + Chl *a* + MLD

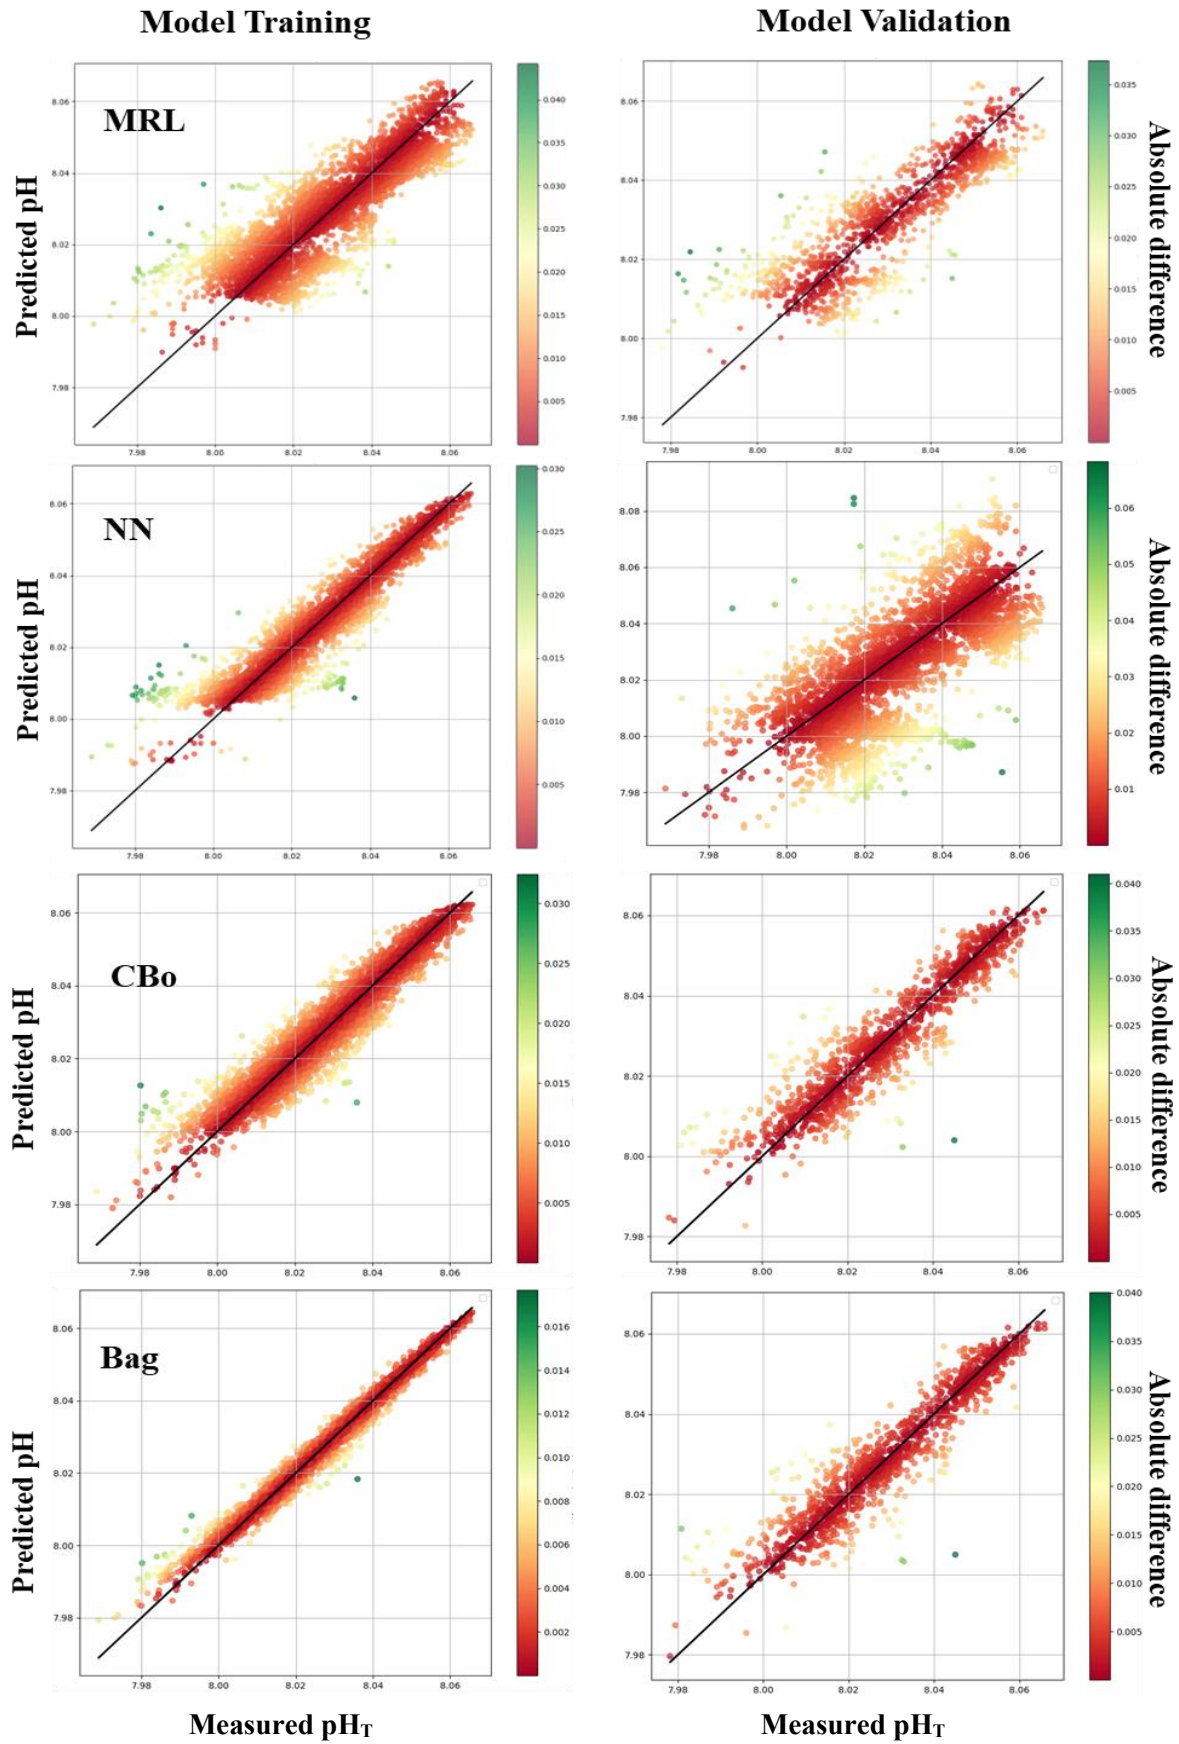

Table S1. Summary of the field data included in the model.

| Observing system                        | Name                    | Time range            | Frequency   | Observations |
|-----------------------------------------|-------------------------|-----------------------|-------------|--------------|
| Voluntary Observing Ships vessels (VOS) | Bechinjigua Express     | Feb. 2019 – Feb. 2024 | Twice a day | 208,507      |
|                                         | Jona Sophie (Renate P.) | Feb. 2019 – Feb. 2024 | weekly      | 121,431      |
| Oceanographic buoys                     | MORGAN-1                | Jan. 2020 – Feb. 2024 | 3-hourly    | 10,975       |
|                                         | ULA-2                   | Feb. 2020 – Sep. 2021 | 3-hourly    | 1,184        |

Table S2. Algorithm performance between predicted  $p\text{CO}_{2,\text{sw}}$  ( $\mu\text{atm}$ ) and measured  $p\text{CO}_{2,\text{sw}}$  ( $\mu\text{atm}$ ) for each model using the validation data set.

| Algorithm              | Variables                                                         | $R^2$        | RMSE<br>( $\mu\text{atm}$ ) | MAE<br>( $\mu\text{atm day}^{-1}$ ) | SSE<br>( $\mu\text{atm}^2 \text{ day}^{-1}$ ) |
|------------------------|-------------------------------------------------------------------|--------------|-----------------------------|-------------------------------------|-----------------------------------------------|
| MLR                    | SST                                                               | 0.612        | 11.2                        | 9.1                                 | 22.7                                          |
|                        | SST + Chl-a                                                       | 0.697        | 10.4                        | 8.2                                 | 22.0                                          |
|                        | SST + MLD                                                         | 0.728        | 10.0                        | 8.1                                 | 21.2                                          |
|                        | SST + Chl-a + MLD                                                 | 0.736        | 10.0                        | 7.9                                 | 19.1                                          |
|                        | SST + $p\text{CO}_{2,\text{atm}}$                                 | 0.759        | 9.6                         | 7.8                                 | 18.7                                          |
|                        | <b>SST + Chl-a + MLD + <math>p\text{CO}_{2,\text{atm}}</math></b> | <b>0.802</b> | <b>8.2</b>                  | <b>7.0</b>                          | <b>16.7</b>                                   |
| Neural Network<br>(NN) | SST                                                               | 0.732        | 11.8                        | 9.0                                 | 27.8                                          |
|                        | SST + Chl-a                                                       | 0.751        | 11.0                        | 8.8                                 | 25.5                                          |
|                        | SST + MLD                                                         | 0.798        | 10.8                        | 8.1                                 | 21.6                                          |
|                        | SST + Chl-a + MLD                                                 | 0.836        | 8.9                         | 6.1                                 | 17.9                                          |
|                        | SST + $p\text{CO}_{2,\text{atm}}$                                 | 0.836        | 8.7                         | 6.0                                 | 19.1                                          |
|                        | <b>SST + Chl-a + MLD + <math>p\text{CO}_{2,\text{atm}}</math></b> | <b>0.862</b> | <b>8.4</b>                  | <b>5.9</b>                          | <b>17.9</b>                                   |
| CatBoost               | SST                                                               | 0.725        | 10.5                        | 7.6                                 | 16.8                                          |
|                        | SST + Chl-a                                                       | 0.819        | 8.9                         | 6.0                                 | 9.6                                           |
|                        | SST + MLD                                                         | 0.836        | 8.0                         | 5.6                                 | 7.7                                           |
|                        | SST + Chl-a + MLD                                                 | 0.914        | 7.0                         | 4.6                                 | 4.9                                           |
|                        | SST + $p\text{CO}_{2,\text{atm}}$                                 | 0.899        | 6.2                         | 6.9                                 | 5.0                                           |
|                        | <b>SST + Chl-a + MLD + <math>p\text{CO}_{2,\text{atm}}</math></b> | <b>0.926</b> | <b>5.9</b>                  | <b>8.5</b>                          | <b>4.3</b>                                    |
| Bagging                | SST                                                               | 0.872        | 8.9                         | 6.8                                 | 5.0                                           |
|                        | SST + Chl-a                                                       | 0.908        | 8.0                         | 6.0                                 | 3.1                                           |
|                        | SST + MLD                                                         | 0.936        | 5.8                         | 5.4                                 | 1.9                                           |
|                        | SST + Chl-a + MLD                                                 | 0.955        | 5.4                         | 4.0                                 | 1.2                                           |
|                        | SST + $p\text{CO}_{2,\text{atm}}$                                 | 0.937        | 5.2                         | 4.4                                 | 1.7                                           |
|                        | <b>SST + Chl-a + MLD + <math>p\text{CO}_{2,\text{atm}}</math></b> | <b>0.955</b> | <b>4.3</b>                  | <b>3.2</b>                          | <b>1.1</b>                                    |



Table S3. Algorithm performance between predicted and measured  $\text{pH}_{\text{T,issw}}$  for each model using the validation data set.

| Algorithm                  | Variables         | $R^2$        | RMSE         | MAE          | SSE          |
|----------------------------|-------------------|--------------|--------------|--------------|--------------|
| <b>MLR</b>                 | SST               | 0.678        | 0.010        | 0.008        | 0.067        |
|                            | SST + Chl-a       | 0.714        | 0.009        | 0.007        | 0.051        |
|                            | SST + MLD         | 0.729        | 0.009        | 0.007        | 0.026        |
|                            | SST + Chl-a + MLD | <b>0.737</b> | <b>0.008</b> | <b>0.007</b> | <b>0.021</b> |
| <b>Neural Network (NN)</b> | SST               | 0.710        | 0.009        | 0.008        | 0.051        |
|                            | SST + Chl-a       | 0.725        | 0.008        | 0.008        | 0.028        |
|                            | SST + MLD         | 0.739        | 0.008        | 0.007        | 0.022        |
|                            | SST + Chl-a + MLD | <b>0.818</b> | <b>0.006</b> | <b>0.007</b> | <b>0.013</b> |
| <b>CatBoost</b>            | SST               | 0.742        | 0.008        | 0.006        | 0.050        |
|                            | SST + Chl-a       | 0.821        | 0.007        | 0.006        | 0.007        |
|                            | SST + MLD         | 0.853        | 0.006        | 0.004        | 0.010        |
|                            | SST + Chl-a + MLD | <b>0.893</b> | <b>0.005</b> | <b>0.004</b> | <b>0.003</b> |
| <b>Bagging</b>             | SST               | 0.879        | 0.009        | 0.007        | 0.017        |
|                            | SST + Chl-a       | 0.882        | 0.007        | 0.006        | 0.014        |
|                            | SST + MLD         | 0.926        | 0.005        | 0.006        | 0.009        |
|                            | SST + Chl-a + MLD | <b>0.959</b> | <b>0.003</b> | <b>0.002</b> | <b>0.006</b> |

Table S4. AIC computed for the MLR model of  $p\text{CO}_{2,\text{sw}}$ .

| Variables                                                            | AICc          | $\Delta\text{AICc}$ |
|----------------------------------------------------------------------|---------------|---------------------|
| SST                                                                  | 127.885       | 52.654              |
| SST + Chl-a                                                          | 123.994       | 48.763              |
| SST + MLD                                                            | 113.823       | 38.592              |
| SST + Chl-a + MLD                                                    | 109.954       | 34.723              |
| $p\text{CO}_{2,\text{atm}} + \text{SST} + \text{Chl-a} + \text{MLD}$ | <b>75.231</b> | <b>0.00</b>         |

Table S5. AIC computed for the MLR model of pH<sub>T,issw</sub>.

| Variables         | AICc    | ΔAICc   |
|-------------------|---------|---------|
| SST               | 193.129 | 0.000   |
| SST + Chl-a       | 196.109 | 172.629 |
| SST + MLD         | 197.860 | 298.023 |
| SST + Chl-a + MLD | 201.856 | 473.035 |
